# Supplementary material
Source: publisher site journal article supplement (https://static.cambridge.org/content/id/urn:cambridge.org:id:article:S1751731119002659/resource/name/S1751731119002659supp001.pdf)
Supplement: Supplementary file 1 [file S1751731119002659supp001.pdf]

**Between and within-herd variation in blood and milk biomarkers in Holstein cows in  
early lactation**

M.A. Krogh, M. Hostens, M. Salavati, C. Grelet, M.T. Sorensen, D.C. Wathes, C.P. Ferris, C. Marchitelli, F. Signorelli, F. Napolitano, F. Becker, T. Larsen, E. Matthews, F. Carter, A. Vanlierde, G. Opsomer, N. Gengler, F. Dehareng, M.A. Crowe, K.L. Ingvarlsen and L. Foldager

*Animal Journal*

# Supplementary Figure S1 (Energy Balance)

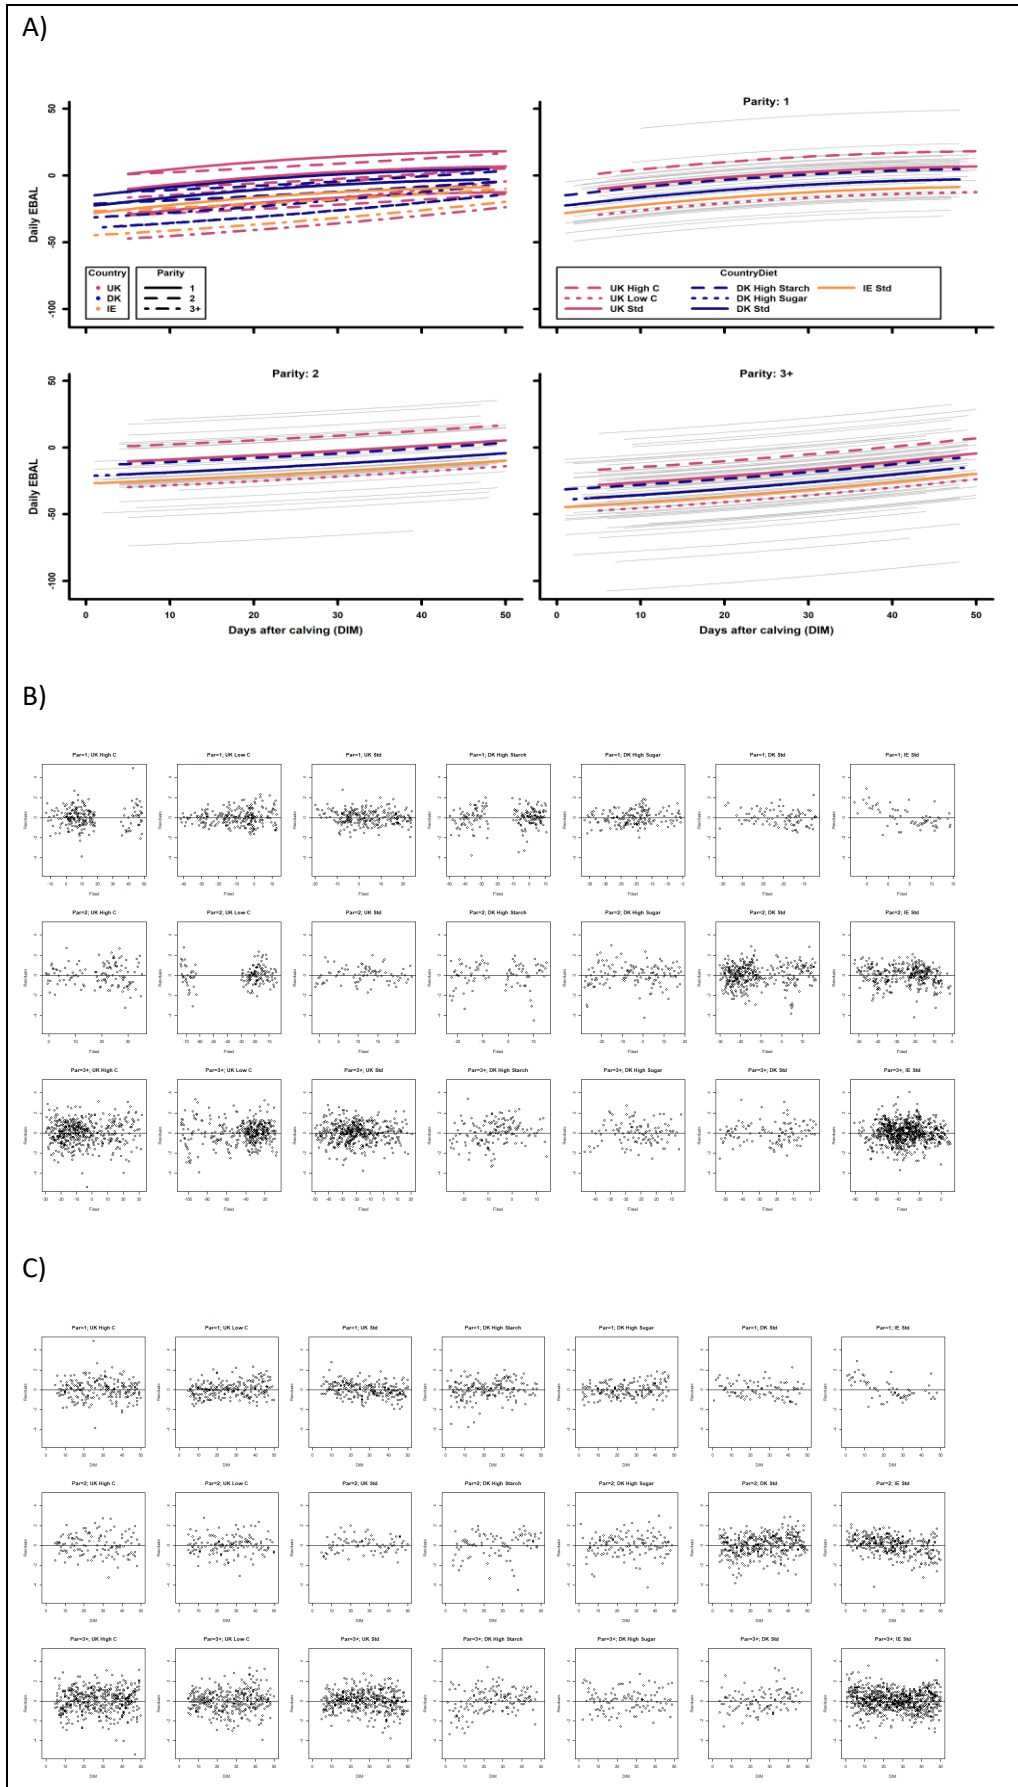

**Supplementary Figure S1** Energy balance (EBAL, in MJ/day) over the study period (1 to 50 days-in-milk (DIM)) divided on herd/diet and parity for the three research farms (UK, DK and IE) where individual Holstein dairy cow feed intakes were recorded daily, and appropriate feed sampling undertaken. Random 2<sup>nd</sup> order polynomial regression was used with a random intercept for herd/diet (three different diets for each of UK (High Concentrate (High C), Low Concentrate (Low C) and Standard (Std)), and DK (High Starch, High Sugar and Std), and one for IE (Std)) and cow. Fixed effects included parity (Par) with first (1), second (2), and third or more (3+), DIM and DIM<sup>2</sup>, and all two-way interactions. The model was fitted by the 'lme' function from the 'nlme' package in R. **Plot A)** The thin grey lines shown in three of the panels are the predictions for each cow, while the coloured lines are herd/diet and parity specific (see legends in the two upper panels). The upper left panel can be used to compare across herd/diets and parities, whereas the other three panels show the separate results for each parity group. **Plot B)** Fitted vs. Residual plots. Several deviant patterns are observed. Funnel-shapes (Par1-UK-low C). Trends (Par1-DK-Std and Par1, IE-Std). **Plot C)** DIM of sampling vs. residuals plots of the analysis of Energy balance. A trend appears in Par2-IE-Std. Multiple negative outliers in Par2-DK-HighStarch and Par3-DK-HighStarch.

# Supplementary Figure S2 (Uric Acid)

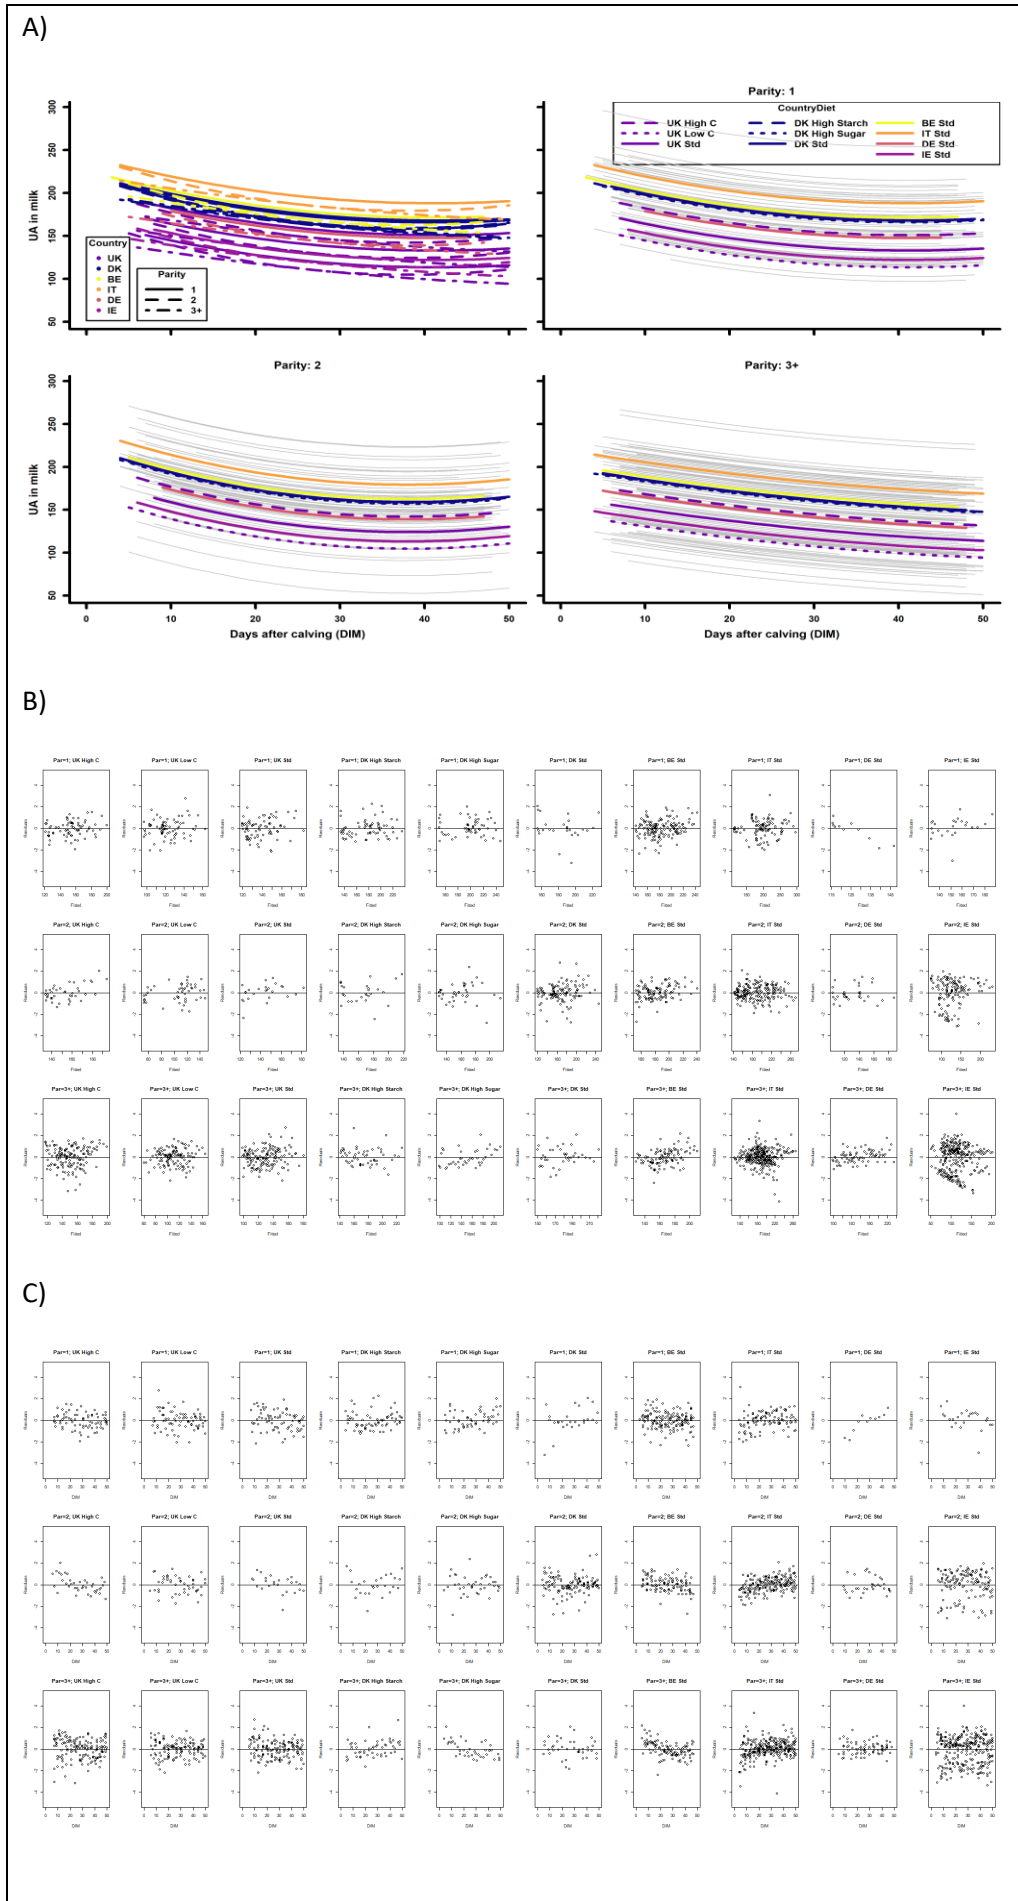

**Supplementary Figure S2** Uric Acid (UA in  $\mu\text{M}$ ) over the study period (1 to 50 days-in-milk (DIM)) divided on herd/diet and parity. Random 2<sup>nd</sup> order polynomial regression was used with a random intercept for herd/diet (three different diets for each of UK (High Concentrate (High C), Low Concentrate (Low C) and Standard (Std)), and DK (High Starch, High Sugar and Std), and one for IE (Std)) and cow. Fixed effects included parity (Par) with first (1), second (2), and third or more (3+), DIM and DIM<sup>2</sup>, and all two-way interactions. The model was fitted by the 'lme' function from the 'nlme' package in R. **Plot A)** The thin grey lines shown in three of the panels are the predictions for each cow, while the coloured lines are herd/diet and parity specific (see legends in the two upper panels). The upper left panel can be used to compare across herd/diets and parities, whereas the other three panels show the separate results for each parity group. **Plot B)** Fitted vs. Residual plots for the analysis of Uric Acid. An extreme outlier >20 was removed. Funnel patterns can be seen in Par3+IT-Std and Par3+IT-Std. and there more residuals below -2 than above +2. **Plot C)** DIM of sampling vs. residuals plots of the analysis of Uric Acid. An extreme outlier >20 was removed. Possible trend in Par3+BE-Std and Par3+DK-High Sugar.

# Supplementary Figure S3 (urea)

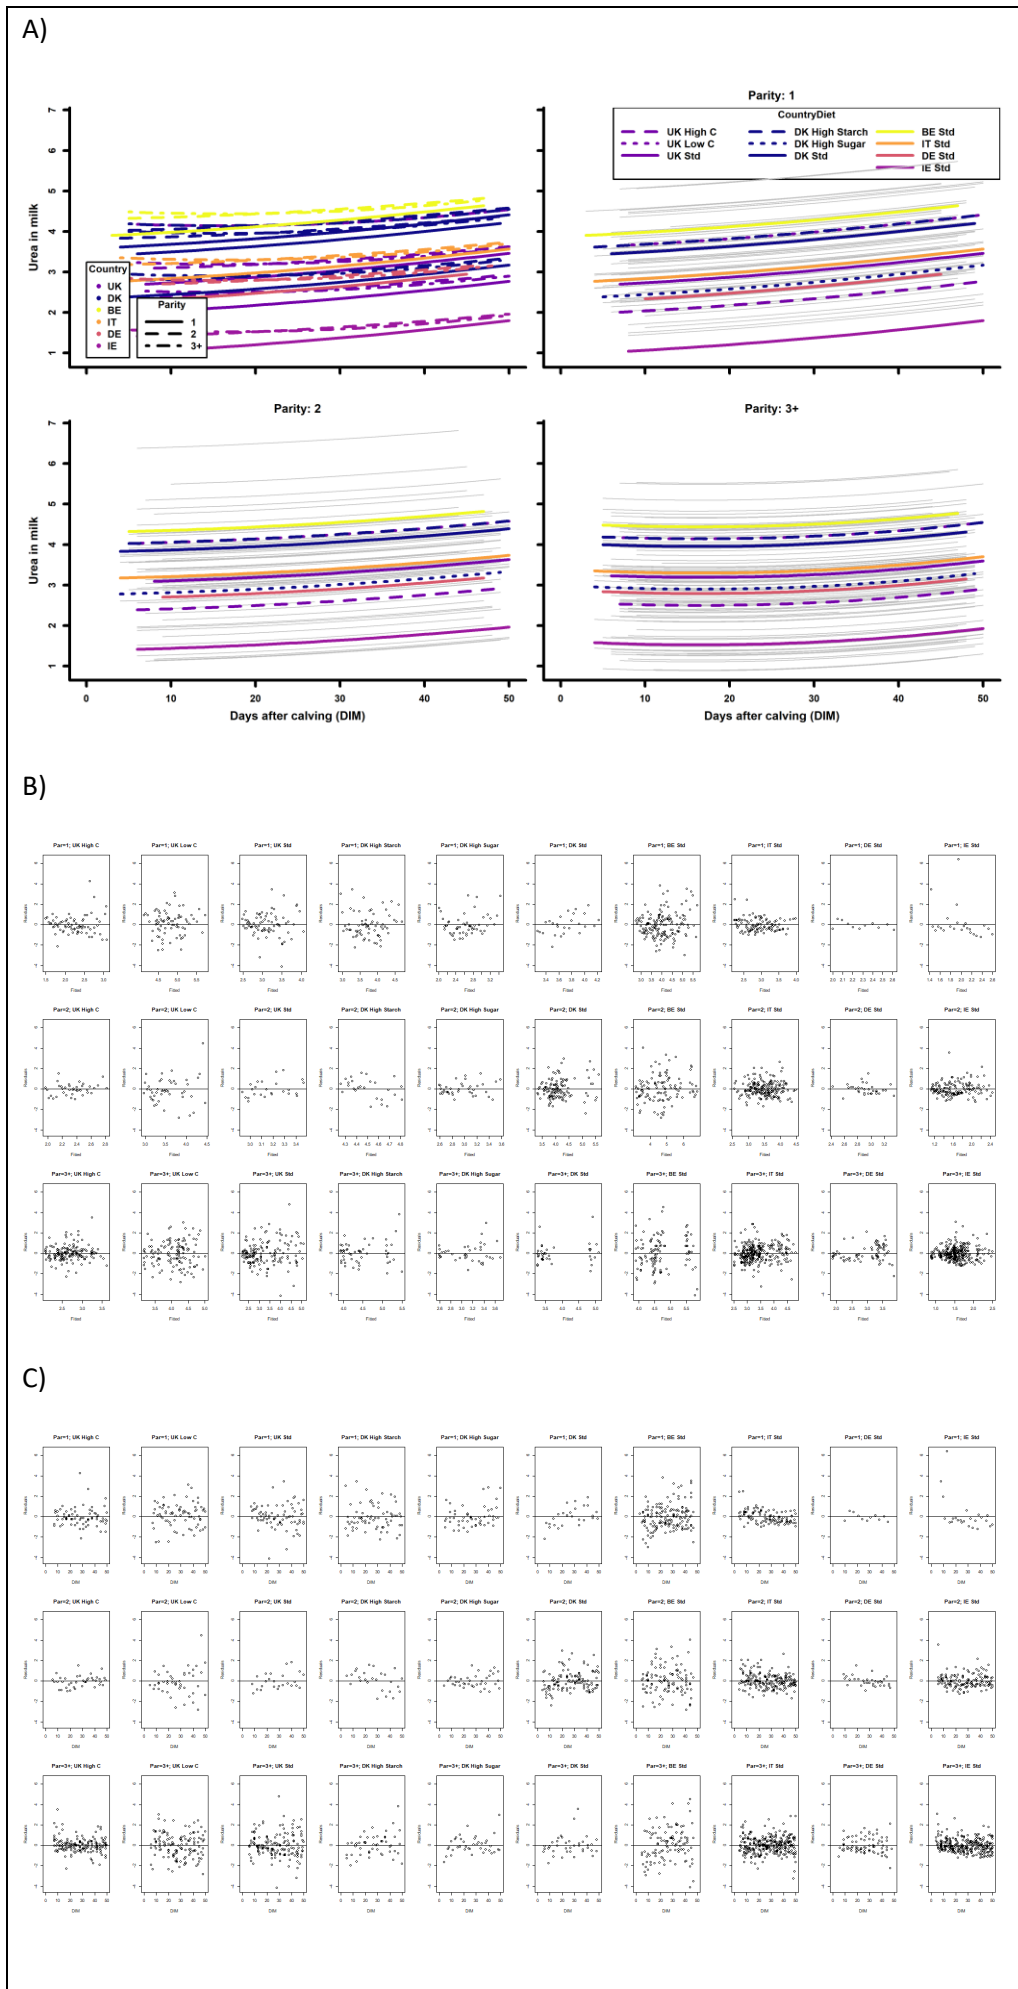

**Supplementary Figure S3** Urea (mM) over the study period (1 to 50 days-in-milk (DIM)) divided on herd/diet and parity. Random 2<sup>nd</sup> order polynomial regression was used with a random intercept for herd/diet (three different diets for each of UK (High Concentrate (High C), Low Concentrate (Low C) and Standard (Std)), and DK (High Starch, High Sugar and Std), and one for IE (Std)) and cow. Fixed effects included parity (Par) with first (1), second (2), and third or more (3+), DIM and DIM<sup>2</sup>, and all two-way interactions. The model was fitted by the 'lme' function from the 'nlme' package in R. **Plot A)** The thin grey lines shown in three of the panels are the predictions for each cow, while the coloured lines are herd/diet and parity specific (see legends in the two upper panels). The upper left panel can be used to compare across herd/diets and parities, whereas the other three panels show the separate results for each parity group. The panels demonstrate substantial differences between different herds/diets. **Plot B)** Fitted vs. Residual plots for the analysis of Urea (mM) The plots show some differences between different herds/diets within parity (e.i. Par1-BE-Std and Par1-IT-Std), but also what seems to be larger residuals for increasing parity. **Plot C)** DIM of sampling vs. residuals plots of the analysis of Urea. The plots show tendencies for funnel shapes (Par1-UK-Std) and trends (Par1-DK-Std).

# Supplementary Figure S4 (Isocitrate)

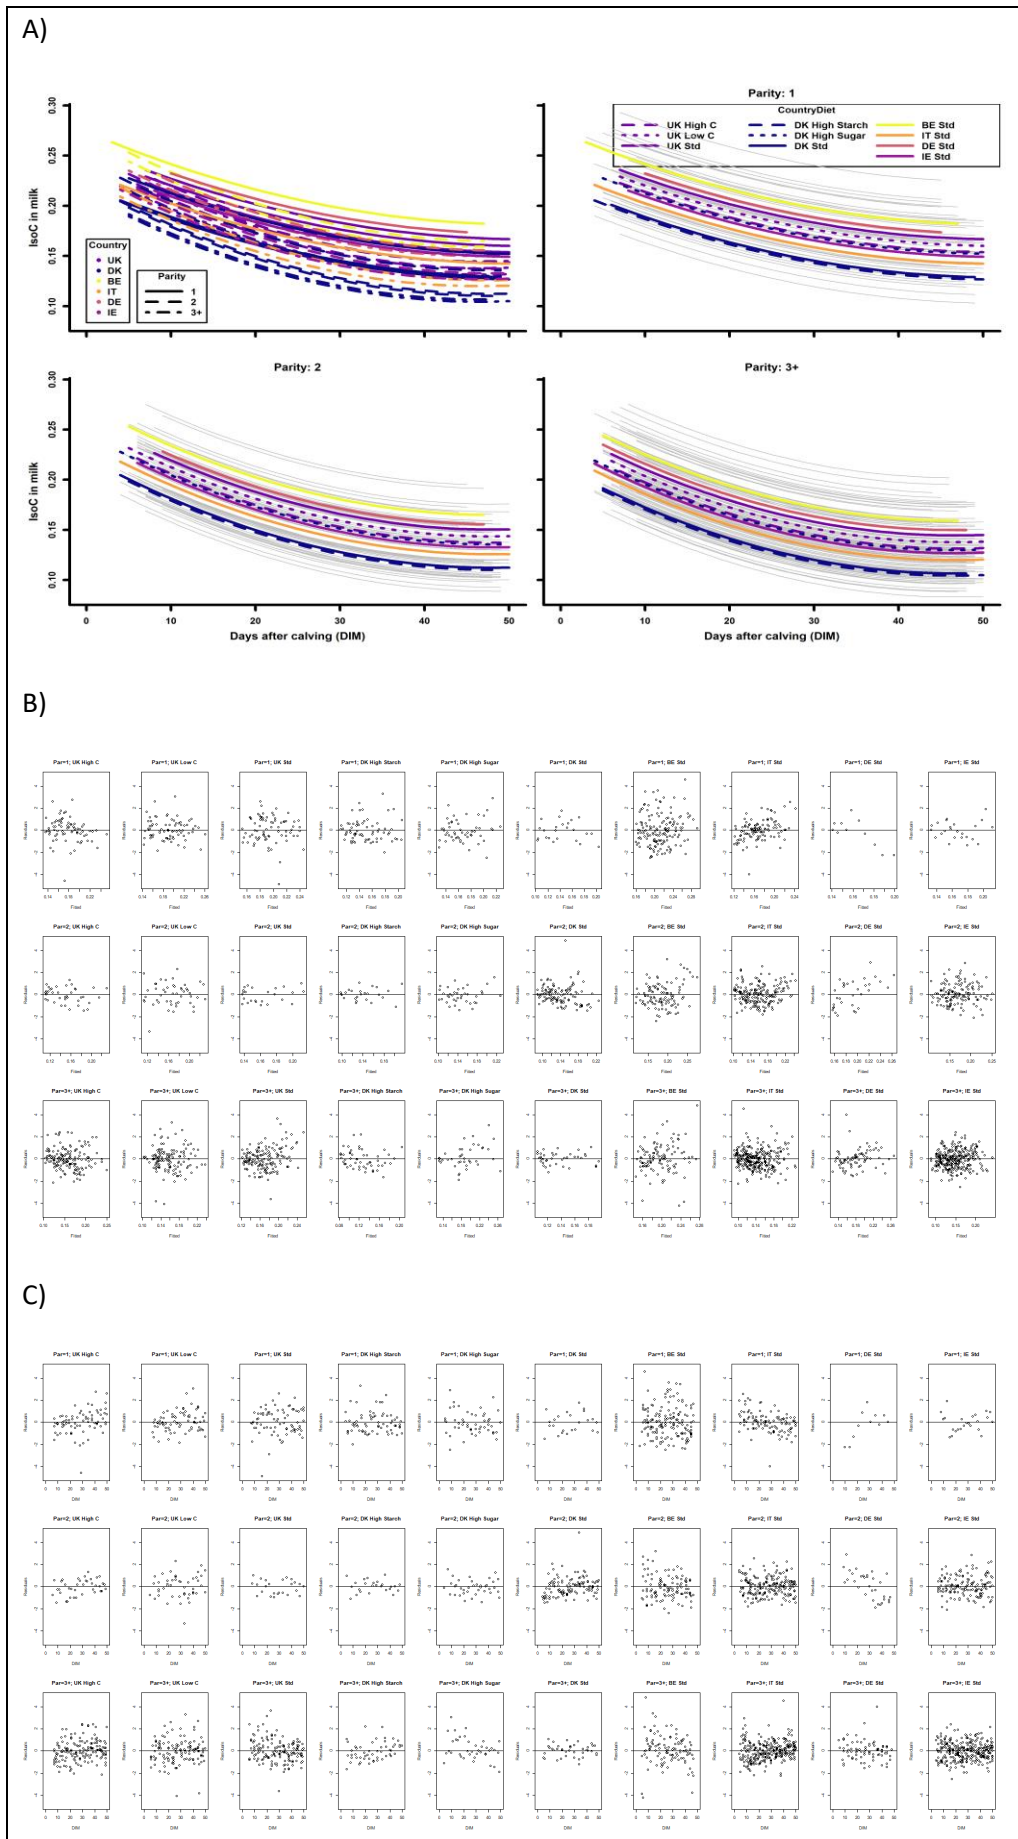



**Supplementary Figure S4** Isocitrate (IsoC in mM) over the study period (1 to 50 days-in-milk (DIM)) divided on herd/diet and parity. Random 2<sup>nd</sup> order polynomial regression was used with a random intercept for herd/diet (three different diets for each of UK (High Concentrate (High C), Low Concentrate (Low C) and Standard (Std)), and DK (High Starch, High Sugar and Std), and one for IE (Std)) and cow. Fixed effects included parity (Par) with first (1), second (2), and third or more (3+), DIM and DIM<sup>2</sup>, and all two-way interactions. The model was fitted by the 'lme' function from the 'nlme' package in R. **Plot A)** The thin grey lines shown in three of the panels are the predictions for each cow, while the coloured lines are herd/diet and parity specific (see legends in the two upper panels). The upper left panel can be used to compare across herd/diets and parities, whereas the other three panels show the separate results for each parity group. **Plot B)** Fitted vs. Residual plots for the analysis of Isocitrate. The plots several outliers (Par1-BE-Std) and differences in variation in different herd/diets (Par3+-DK-Std vs Par3+-IT-Std). **Plot C)** DIM of sampling vs. residuals plots of the analysis of Isocitrate. Trend patterns appear in Par1-UK-High C, Par2-UK-High C and Par2-DE-Std.

# Supplementary Figure S5

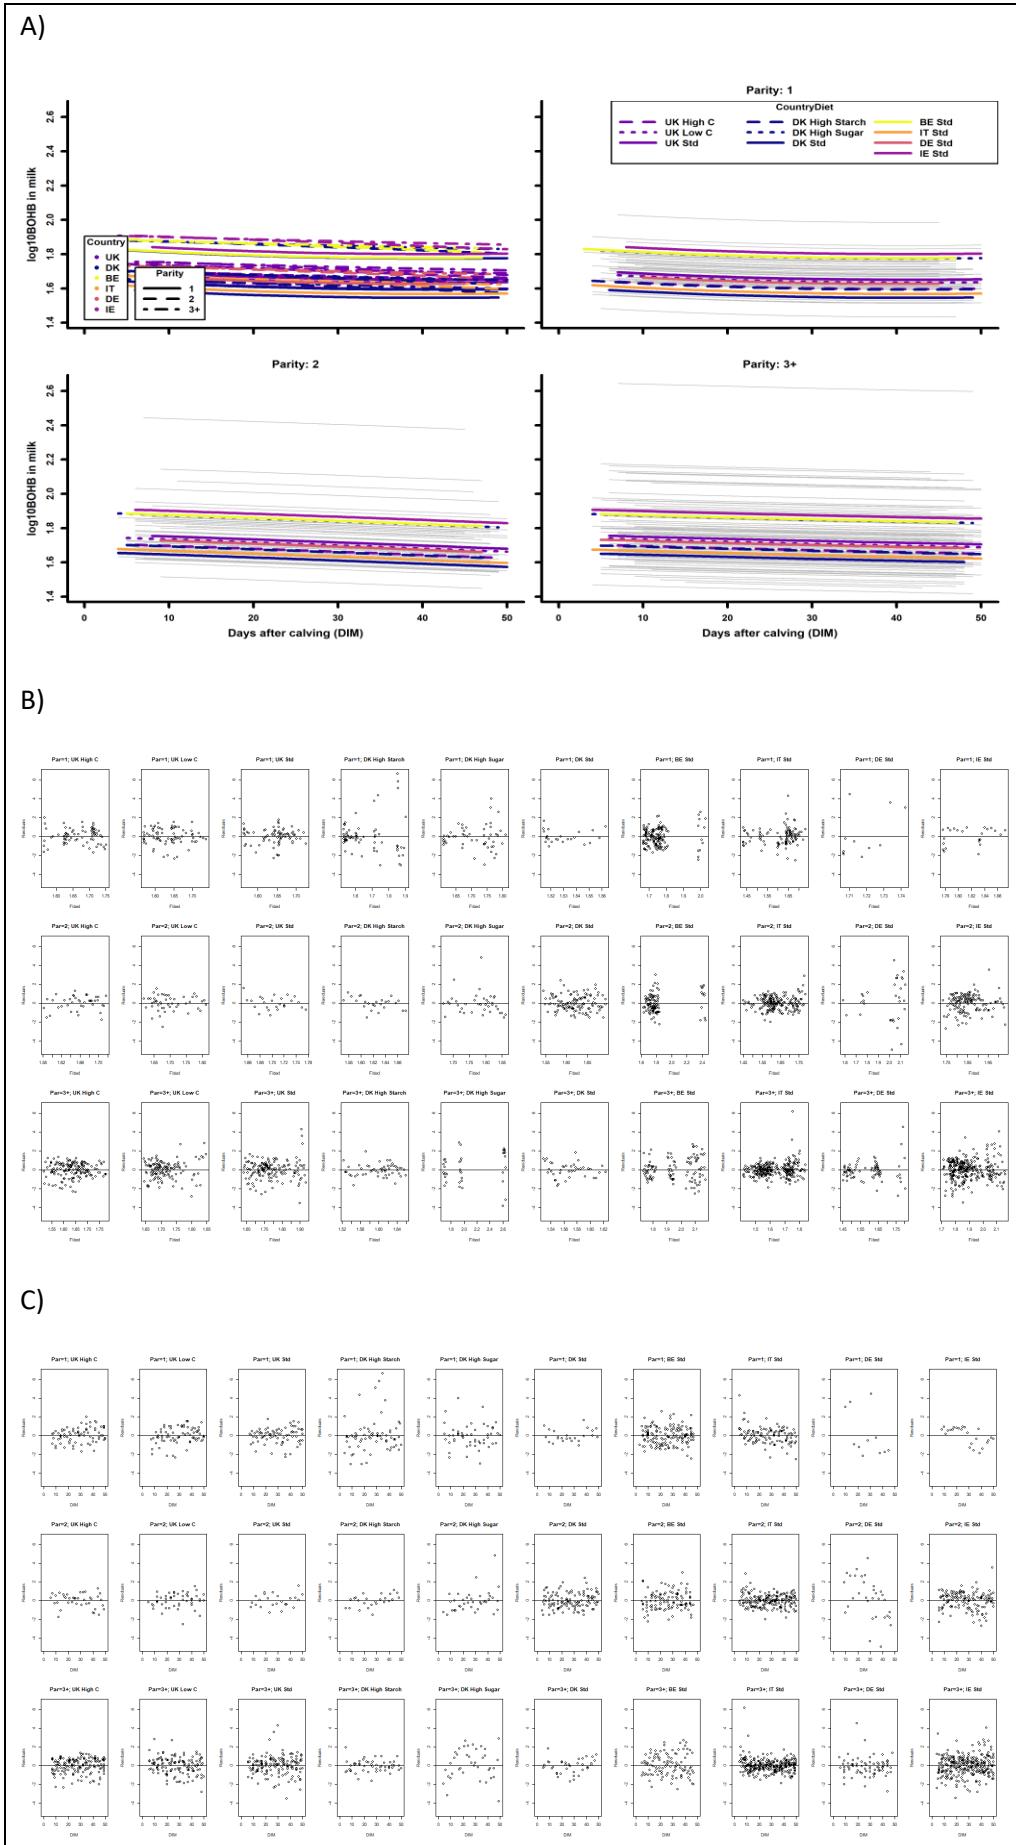

**Supplementary Figure S5**  $\log_{10}(\beta\text{-hydroxybutyrate})$  (BHB in  $\mu\text{M}$ ) over the study period (1 to 50 DIM) divided on herd/diet and parity. Random 2nd order polynomial regression was used with a random intercept for herd/diet (three different diets for each of UK (High Concentrate (High C), Low Concentrate (Low C) and Standard (Std)), and DK (High Starch, High Sugar and Std), and one for IE (Std)) and cow. Fixed effects included parity (Par) with first (1), second (2), and third or more (3+), DIM and DIM2, and all two-way interactions. The model was fitted by the 'lme' function from the 'nlme' package in R. **Plot A)** The thin grey lines shown in three of the panels are the predictions for each cow, while the coloured lines are herd/diet and parity specific (see legends in the two upper panels). The upper left panel can be used to compare across herd/diets and parities, whereas the other three panels show the separate results for each parity group. **Plot B)** Fitted vs. Residual plots for the analysis of  $\log_{10}(\beta\text{-hydroxybutyrate})$ . Multiple outlier in Par1-DK-High Starch and at least one in Par3+IT-Std and Par3+UK-Std. There seems to be differences in variance between the different herds within parity groups. **Plot C)** DIM of sampling vs. residuals plots of the analysis of  $\log_{10}(\beta\text{-hydroxybutyrate})$ . The plots show no apparent, systematic difference over the 50 DIM but some difference in variance between herds within parity group (e.i. Par2+IT-Std and Par2-DE-Std).

# Supplementary Figure S6 (Glucose)

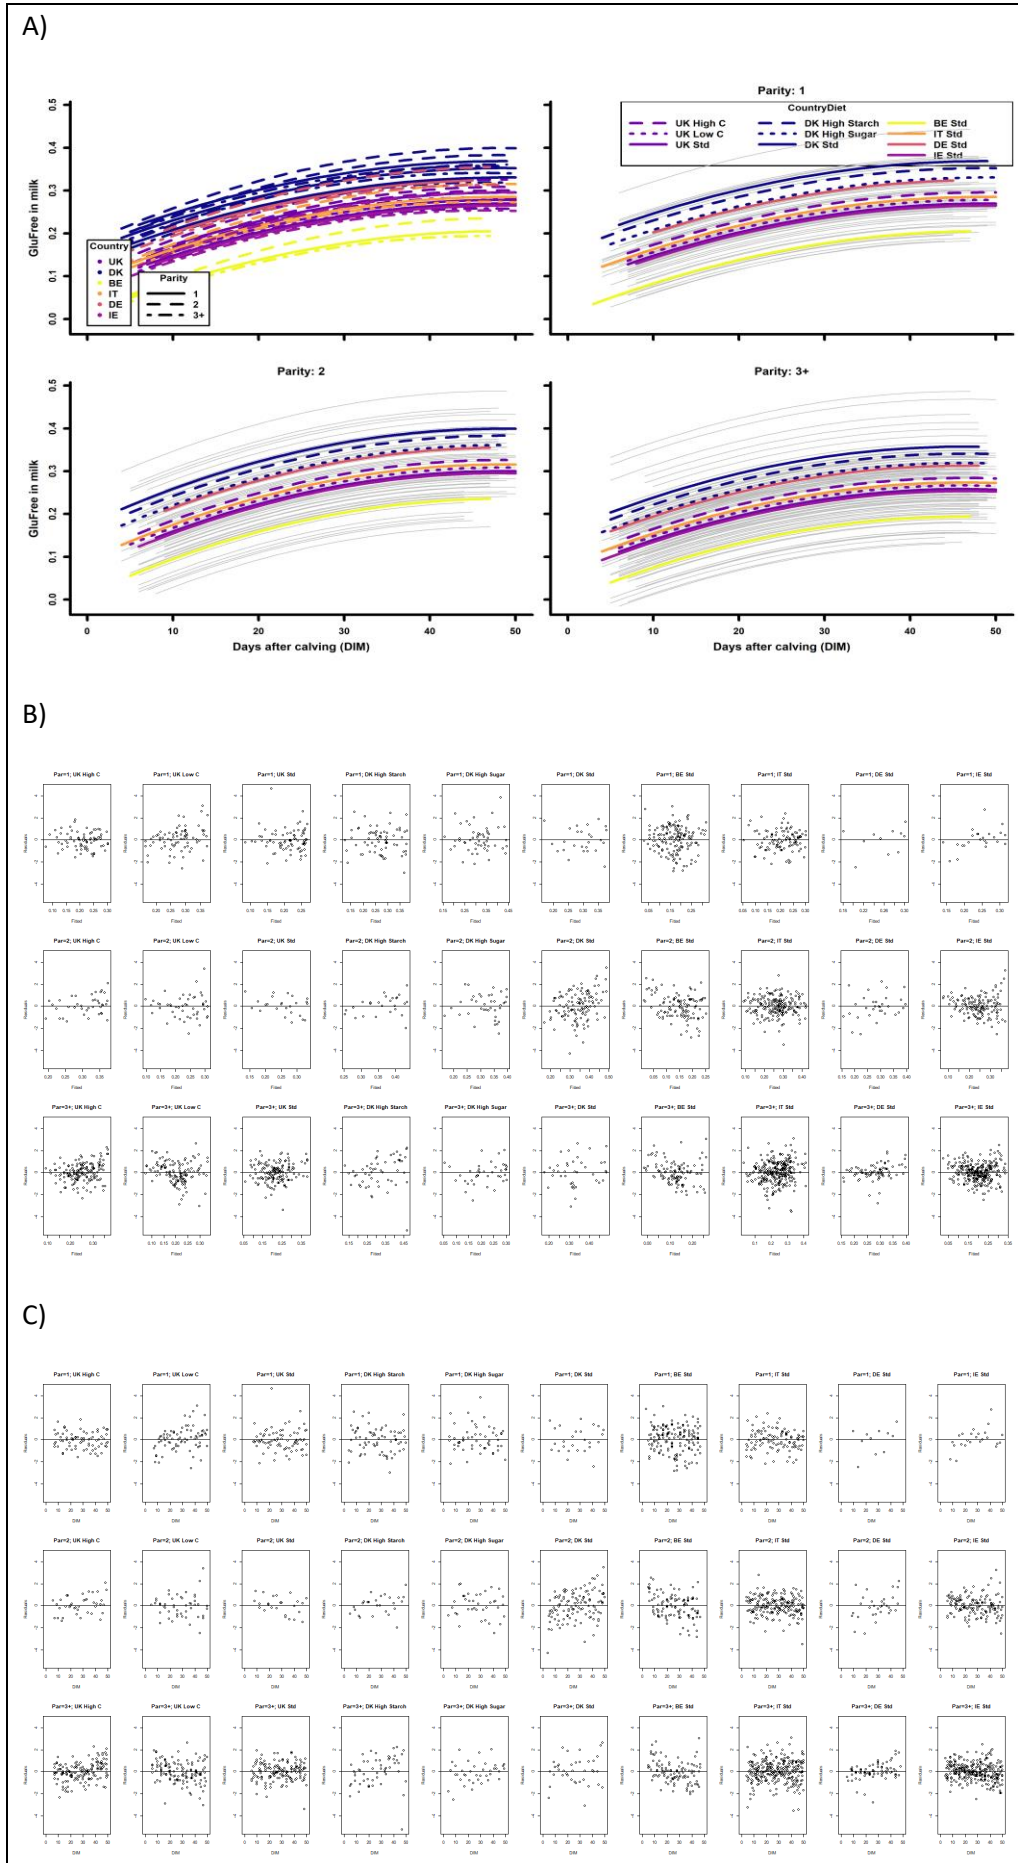

**Supplementary Figure S6** Glucose (GluFree in mM) over the study period (1 to 50 days-in-milk (DIM)) divided on herd/diet and parity. Random 2nd order polynomial regression was used with a random intercept for herd/diet (three different diets for each of UK (High Concentrate (High C), Low Concentrate (Low C) and Standard (Std)), and DK (High Starch, High Sugar and Std), and one for IE (Std)) and cow. Fixed effects included parity (Par) with first (1), second (2), and third or more (3+), DIM and DIM2, and all two-way interactions. The model was fitted by the 'lme' function from the 'nlme' package in R. **Plot A)** The thin grey lines shown in three of the panels are the predictions for each cow, while the coloured lines are herd/diet and parity specific (see legends in the two upper panels). The upper left panel can be used to compare across herd/diets and parities, whereas the other three panels show the separate results for each parity group. **Plot B)** Fitted vs. Residual plots for the analysis of Glucose (mM) over the study period (1 to 50 DIM) divided on herd/diet and parity. Trends appears in Par2-DK-Std and Par2-Be-Std and several plots show individual outliers (Par3+DK-High Stach). **Plot C)** DIM of sampling vs. residuals plots of the analysis of Glucose (mM) over the study period (1 to 50 DIM) divided on herd/diet and parity. A trend appear in the Par3+DK-High Starch.

# Supplementary Figure S7 (Glucose-6-phosphate)

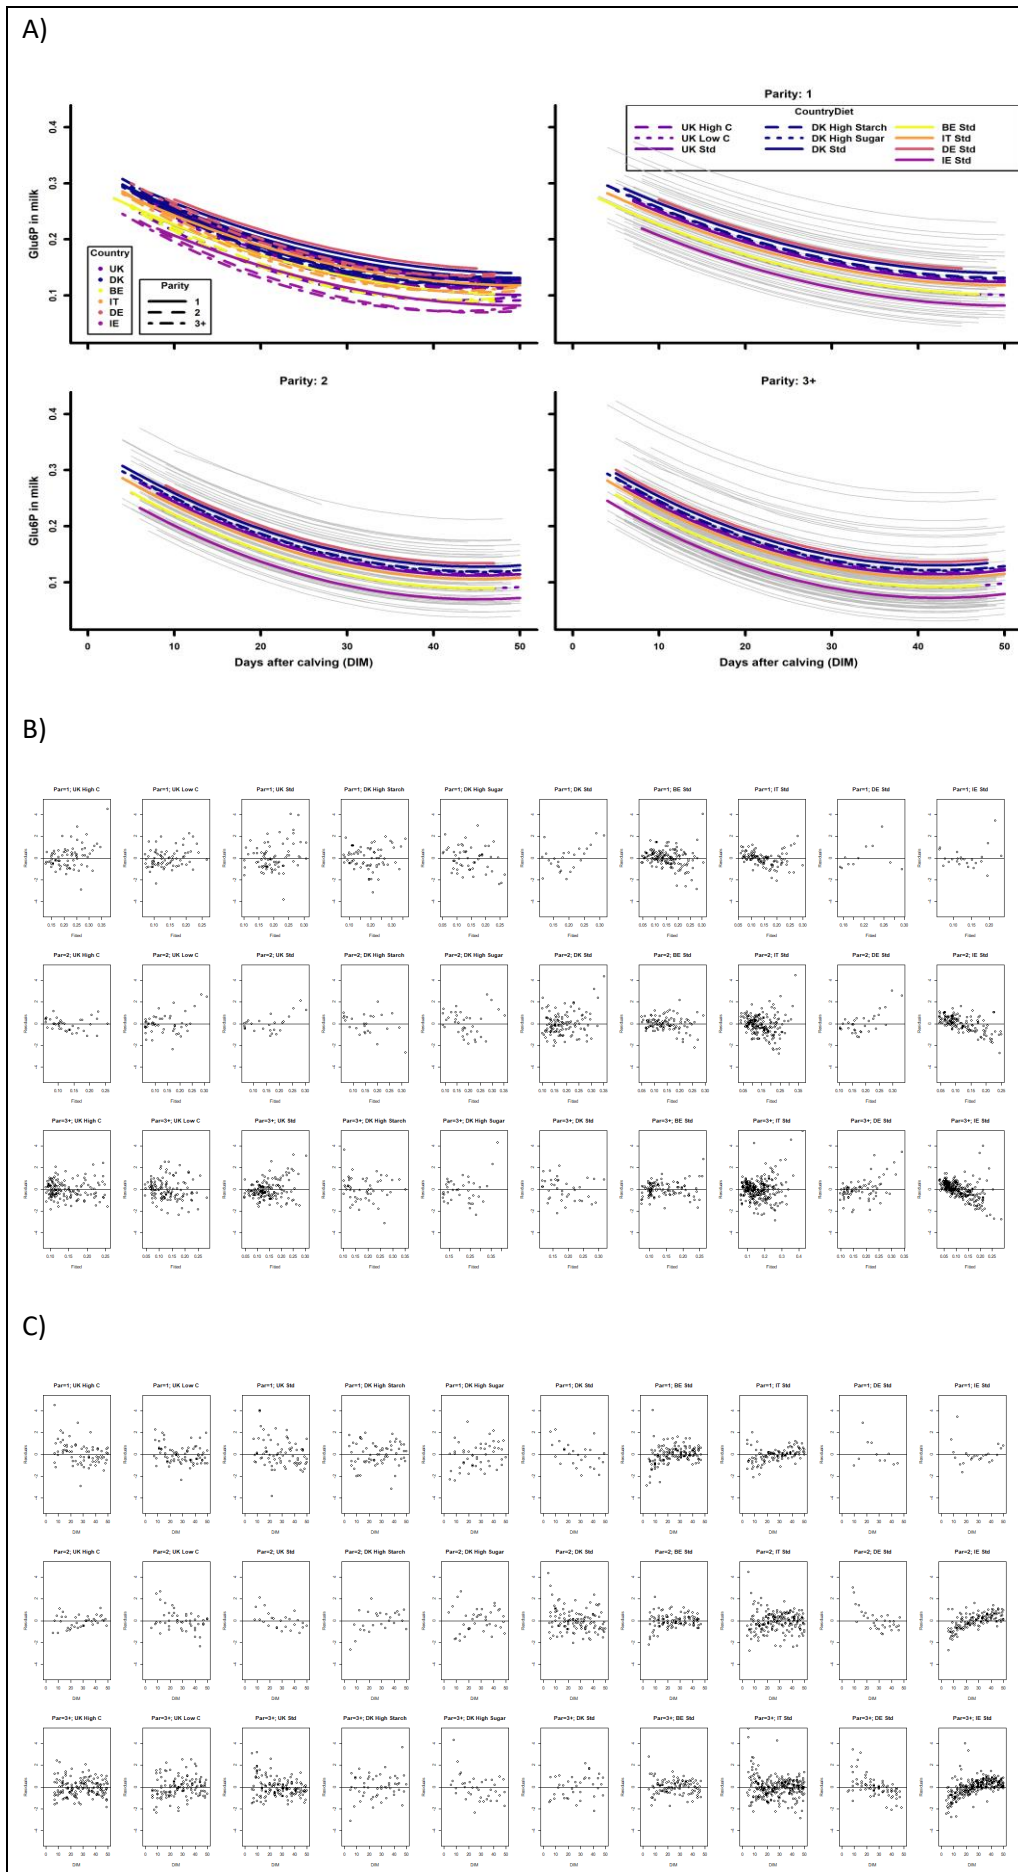

**Supplementary Figure S7** Glucose-6-phosphate (Glu6P in mM) over the study period (1 to 50 day-in-milk (DIM)) divided on herd/diet and parity. Random 2nd order polynomial regression was used with a random intercept for herd/diet (three different diets for each of UK (High Concentrate (High C), Low Concentrate (Low C) and Standard (Std)), and DK (High Starch, High Sugar and Std), and one for IE (Std)) and cow. Fixed effects included parity (Par) with first (1), second (2), and third or more (3+), DIM and DIM2, and all two-way interactions. The model was fitted by the 'lme' function from the 'nlme' package in R. **Plot A)** The thin grey lines shown in three of the panels are the predictions for each cow, while the coloured lines are herd/diet and parity specific (see legends in the two upper panels). **Plot B)** Fitted vs. Residual plots for the analysis of Glucose-6-phosphate (mM) over the study period (1 to 50 DIM) divided on herd/diet and parity. Three extreme outliers are not shown on the plots. Besides outliers trends are seen for Par2-EI-Std and Par3-EI-Std. **Plot C)** DIM of sampling vs. residuals plots of the analysis of Glucose-6-phosphate (mM) over the study period (1 to 50 DIM) divided on herd/diet and parity. Three extreme outliers are not shown on the plots. Trend shapes are seen in Par2-EI-Std and Par3-EI-Std.

# Supplementary Figure S8 (Lactate dehydrogenase)

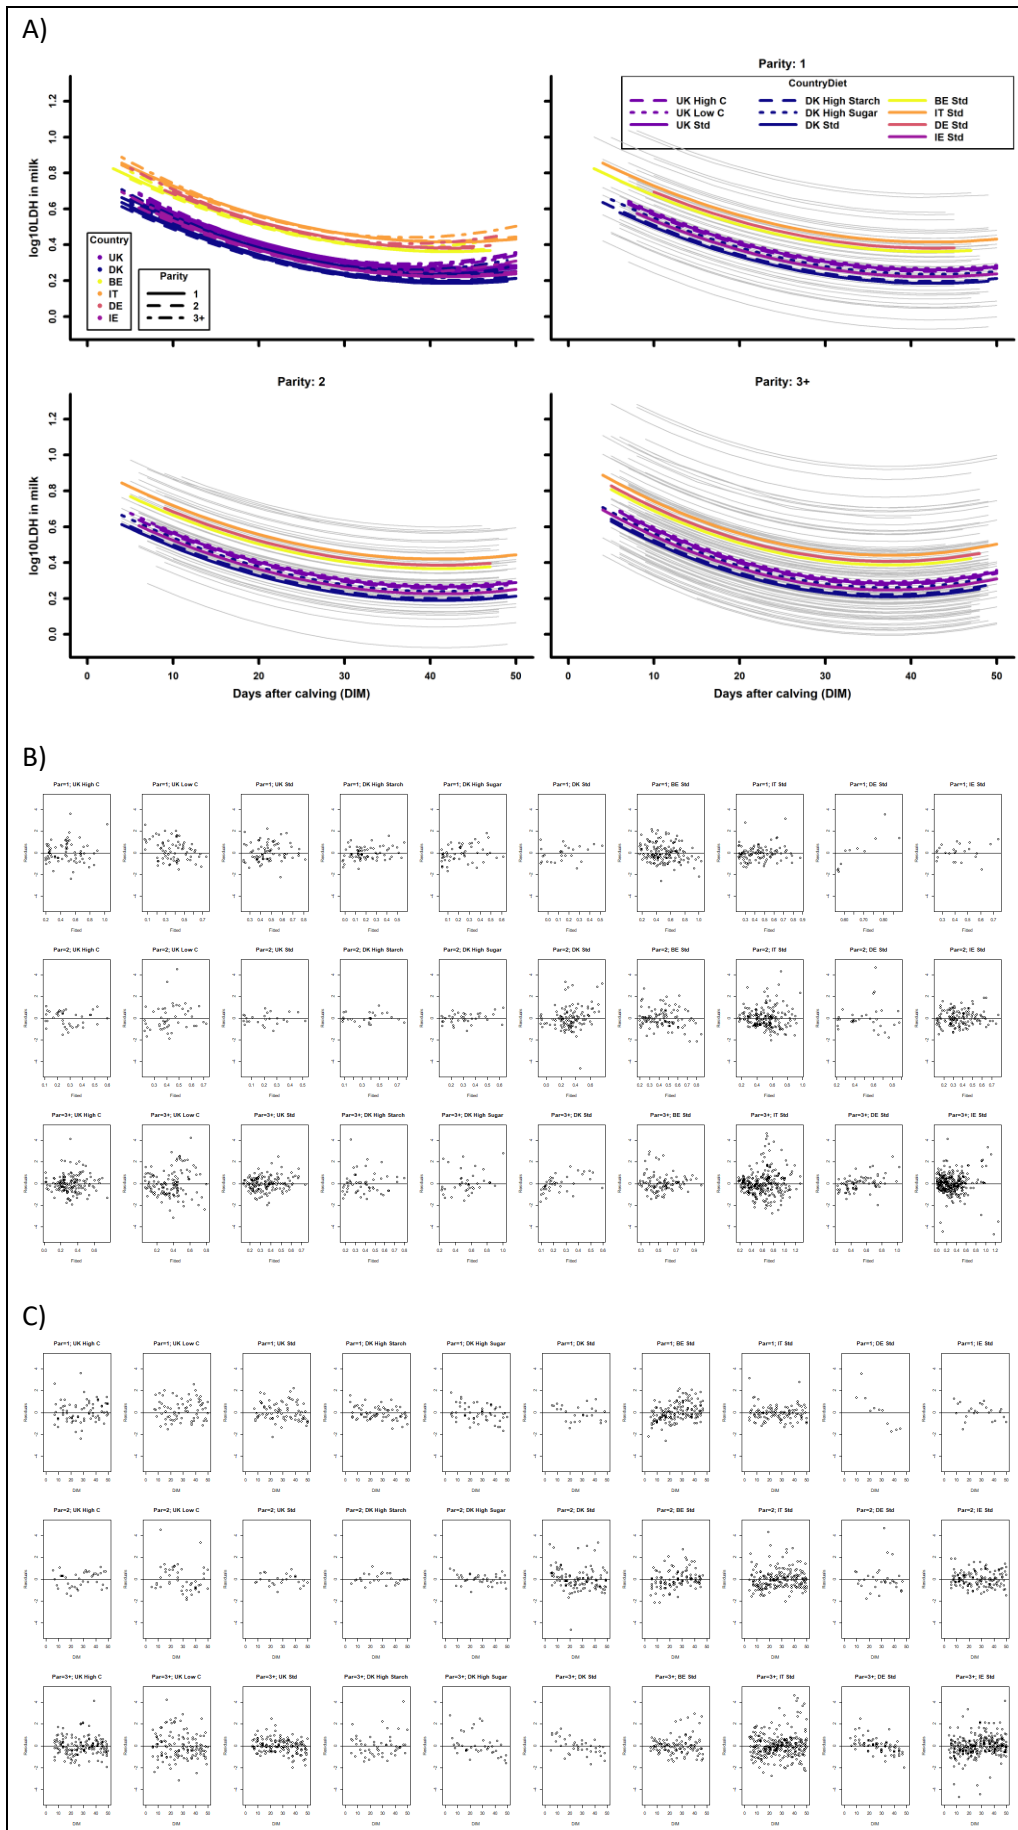



**Supplementary Figure S8**  $\text{Log}_{10}$ (Lactate dehydrogenase) ( $\text{log}_{10}$ (LDH) in units/L) over the study period (1 to 50 days-in-milk (DIM)) divided on herd/diet and parity. Random 2nd order polynomial regression was used with a random intercept for herd/diet (three different diets for each of UK (High Concentrate (High C), Low Concentrate (Low C) and Standard (Std)), and DK (High Starch, High Sugar and Std), and one for IE (Std)) and cow. Fixed effects included parity (Par) with first (1), second (2), and third or more (3+), DIM and DIM2, and all two-way interactions. The model was fitted by the 'lme' function from the 'nlme' package in R. **Plot A)** The thin grey lines shown in three of the panels are the predictions for each cow, while the coloured lines are herd/diet and parity specific (see legends in the two upper panels). The upper left panel can be used to compare across herd/diets and parities, whereas the other three panels show the separate results for each parity group. **Plot B)** Fitted vs. Residual plots for the analysis of  $\text{Log}_{10}$ (Lactate dehydrogenase) over the study period (1 to 50 DIM) divided on herd/diet and parity. One extreme outlier in Par1-UK-Low C has been removed. The plots show no apparent systematic difference with different herd/diets or parity, but a few outlier observations are present (Par 3+, EI). **Plot C)** DIM of sampling vs. residuals plots of the analysis of  $\text{Log}_{10}$ (Lactate dehydrogenase) over the study period (1 to 50 DIM) divided on herd/diet and parity. One extreme outlier in Par1-UK-Low C has been removed. A trend can be seen in Par3+DE-Std.

Supplementary Figure S9 (*N*-acetyl- $\beta$ -D-glucosaminidase)

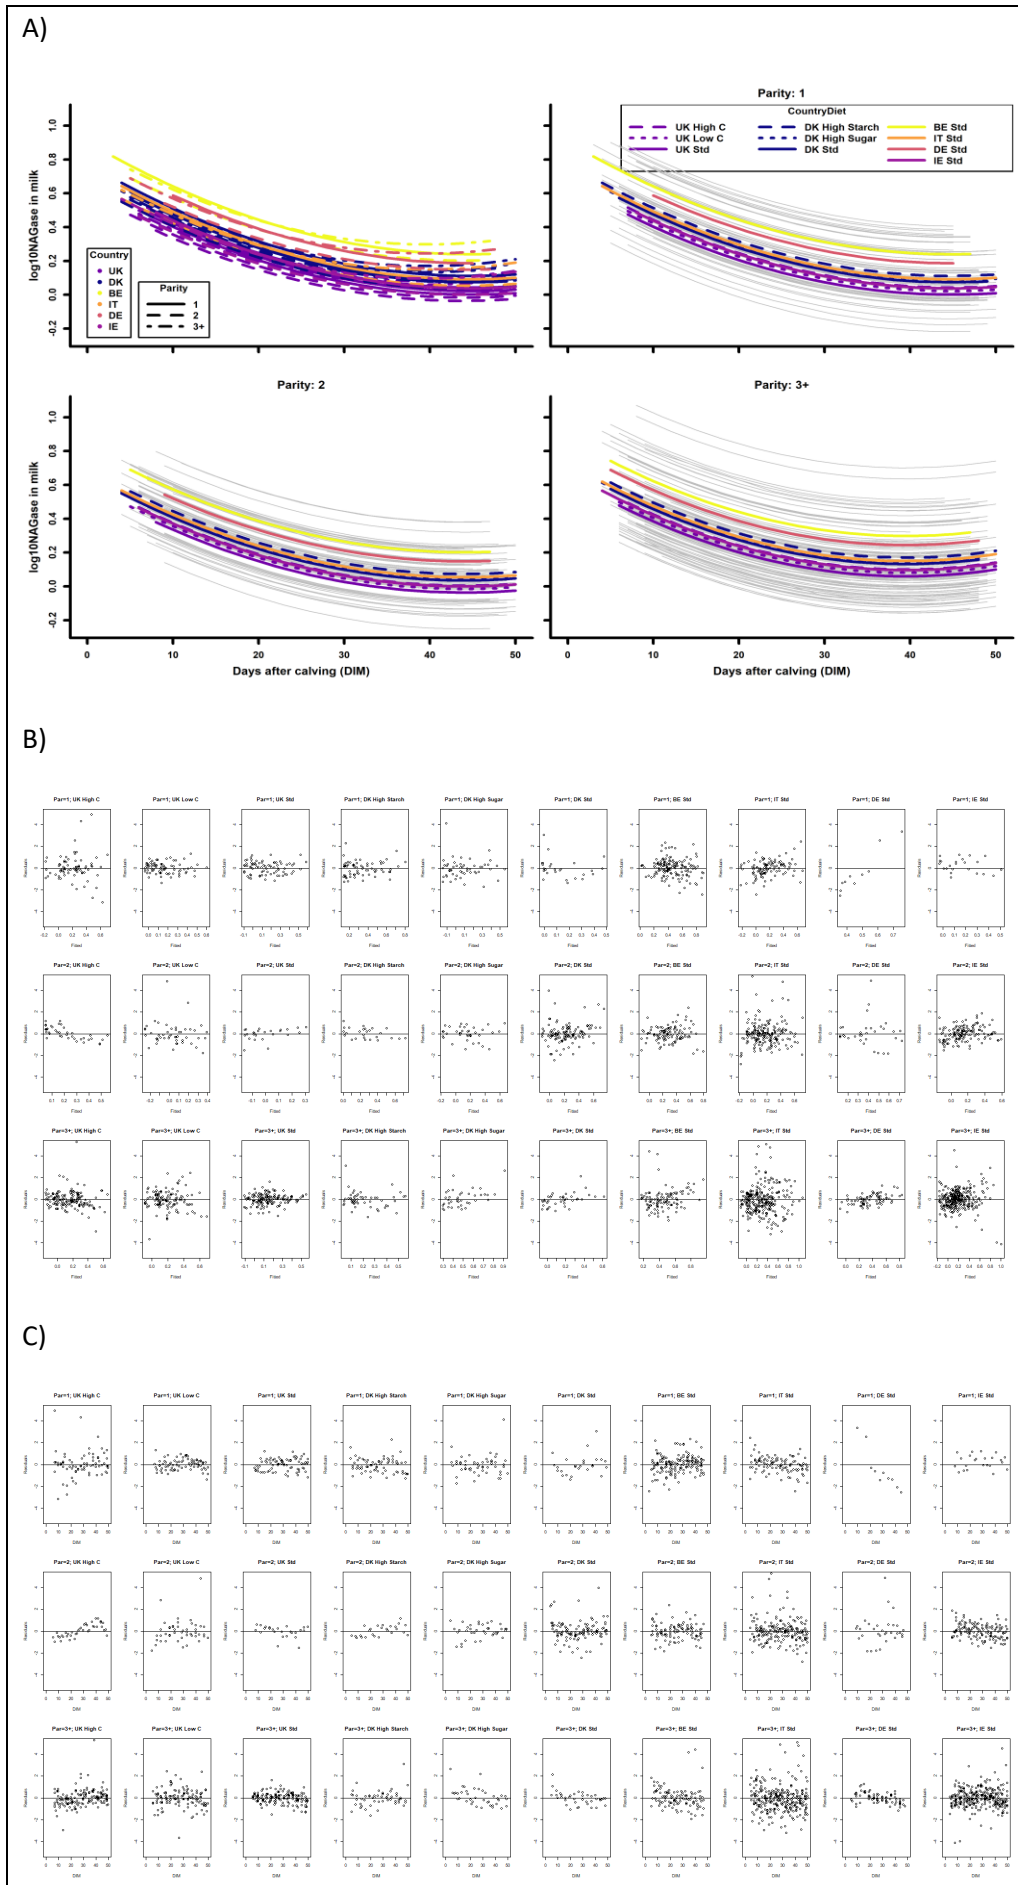

**Supplementary Figure S9**  $\log_{10}$ (N-acetyl- $\beta$ -D-glucosaminidase) (NAGase in Units/L) over the study period (1 to 50 days-in-milk (DIM)) divided on herd/diet and parity. Random 2nd order polynomial regression was used with a random intercept for herd/diet (three different diets for each of UK (High Concentrate (High C), Low Concentrate (Low C) and Standard (Std)), and DK (High Starch, High Sugar and Std), and one for IE (Std)) and cow. Fixed effects included parity (Par) with first (1), second (2), and third or more (3+), DIM and DIM2, and all two-way interactions. The model was fitted by the 'lme' function from the 'nlme' package in R. **Plot A)** The thin grey lines shown in three of the panels are the predictions for each cow, while the coloured lines are herd/diet and parity specific (see legends in the two upper panels). The upper left panel can be used to compare across herd/diets and parities, whereas the other three panels show the separate results for each parity group. **Plot B)** Fitted vs. Residual plots for the analysis of NAGase (Units/L) over the study period (1 to 50 DIM) divided on herd/diet and parity. Five outliers above 5 are not shown. The plots show some difference in variation within parity (e.g. Par3+IT-Std vs. Par3+UK-Std) as well as several outliers in different plots. **Plot C)** DIM of sampling vs. residuals plots of the analysis of NAGase (Units/L) over the study period (1 to 50 DIM) divided on herd/diet and parity. A trend is seen in Par2-UK-High C.

## Supplementary Figure S10 ( $\beta$ -hydroxybutyrate)

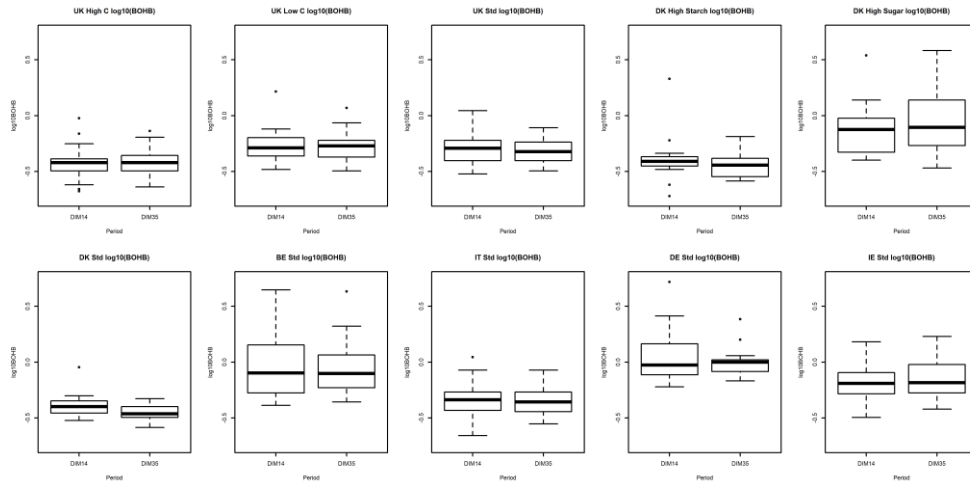

**Supplementary Figure S10** Boxplot of blood  $\beta$ -hydroxybutyrate (BOHB) in Holstein dairy cows for the two different time points (14 and 35 days-in-milk (DIM)) in the different herds/diet combinations (UK (High Concentrate (High C), Low Concentrate (Low C) and Standard (Std)), and DK (High Starch, High Sugar and Std), and one for IE (Std)).

**Supplementary Table S1.** Summary statistics for energy balance (EBAL, in MJ/day) of Holstein dairy cows over the study period (1 to 50 days-in-milk (DIM)) for the three research farms where individual cow intakes were recorded daily, and appropriate feed sampling undertaken

| Herd | Diet        | Mean (SD)    | Median (Q1 ; Q3)      | Min ; Max    | N <sub>cows</sub> | N <sub>samples</sub> |
|------|-------------|--------------|-----------------------|--------------|-------------------|----------------------|
| UK   | Low C       | -29.9 (33.2) | -25.3 (-45.4 ; -9.16) | -166 ; 51.6  | 20                | 738                  |
|      | Standard C  | -9.31 (24.9) | -7.76 (-24.2 ; 8.96)  | -92.7 ; 57.3 | 20                | 778                  |
|      | High C      | 3.1 (28.6)   | 2.43 (-13.9 ; 19.5)   | -110 ; 139   | 21                | 793                  |
|      | Pooled      | -11.6 (32.0) | -9.75 (-29.7 ; 7.78)  | -166 ; 139   | 61                | 2309                 |
| DK   | High starch | -8.85 (27.5) | -3.31 (-26.6 ; 10.5)  | -110 ; 48.9  | 11                | 417                  |
|      | High sugar  | -17.1 (23.4) | -17.6 (-32.9 ; -0.58) | -89.3 ; 46.9 | 10                | 408                  |
|      | Standard    | -16.1 (24.7) | -16.4 (-32.7 ; -1.39) | -104 ; 69.2  | 14                | 568                  |
|      | Pooled      | -14.2 (25.4) | -14.1 (-31.8 ; 3.56)  | -110 ; 69.2  | 35                | 1393                 |
| IE   | Standard    | -29.1 (25.4) | -27.2 (-46.2 ; -11.1) | -117 ; 50.8  | 36                | 1180                 |
| All  | Pooled      | -16.6 (29.6) | -15.5 (-34.8 ; 2.71)  | -166 ; 139   | 132               | 4882                 |

Q1: first quartile, Q3: third quartile, C: concentrate.

**Supplementary Table S2.** Summary statistics for energy balance (EBAL, in MJ/day) over the study period (1 to 50 days-in-milk (DIM)) divided on herds and parity for the three research farms where individual Holstein dairy cow intakes were recorded daily, and appropriate feed sampling undertaken

| Herd | Parity | Mean (SD)    | Median (Q1 ; Q3) <sup>1</sup> | Min ; Max    | N <sub>cows</sub> | N <sub>samples</sub> |
|------|--------|--------------|-------------------------------|--------------|-------------------|----------------------|
| UK   | 1      | 2.03 (23.1)  | 1.76 (-12.5 ; 15.7)           | -66.9 ; 139  | 18                | 685                  |
|      | 2      | -2.76 (33.9) | 1.63 (-21.0 ; 19.8)           | -126 ; 78.7  | 9                 | 349                  |
|      | 3+     | -21.4 (32.3) | -19.2 (-39.4 ; -1.42)         | -166 ; 83.6  | 34                | 1275                 |
| DK   | 1      | -17.8 (22.1) | -17.7 (-32.8 ; -2.18)         | -110 ; 36.9  | 11                | 430                  |
|      | 2      | -9.67 (25.9) | -10.7 (-25.6 ; 8.79)          | .89.3 ; 69.2 | 14                | 593                  |
|      | 3+     | -17.3 (27.1) | -17.8 (-37.0 ; 3.25)          | -104 ; 48.9  | 10                | 370                  |
| IE   | 1      | 5.63 (16.5)  | 3.26 (-4.77 ; 15.8)           | -35.3 ; 50.8 | 2                 | 62                   |
|      | 2      | -25.2 (20.7) | -22.0 (-39.2 ; -9.87)         | -103 ; 20.0  | 11                | 336                  |
|      | 3+     | -33.5 (25.5) | -33.1 (-50.6 ; -16.3)         | -117 ; 50.7  | 23                | 782                  |

<sup>1</sup> Q1: first quartile, Q3: third quartile.

**Supplementary Table S3** Summary statistics of milk metabolites and enzymes in Holstein dairy cows at different days-in-milk (DIM) intervals

| Measure <sup>1</sup>     | Period    | Mean (sd)   | Median (Q1 ; Q3) <sup>2</sup> | Min ; Max     | N <sub>cows</sub> | N <sub>samples</sub> |
|--------------------------|-----------|-------------|-------------------------------|---------------|-------------------|----------------------|
| Glucose-6-phosphate (mM) | DIM 1-7   | 0.26 (0.12) | 0.23 (0.18 ; 0.29)            | 0.11 ; 0.81   | 135               | 142                  |
|                          | DIM 8-14  | 0.23 (0.09) | 0.21 (0.16 ; 0.28)            | 0.07 ; 0.93   | 219               | 424                  |
|                          | DIM 15-21 | 0.18 (0.06) | 0.16 (0.13 ; 0.22)            | 0.04 ; 0.39   | 218               | 428                  |
|                          | DIM 22-28 | 0.14 (0.05) | 0.14 (0.11 ; 0.17)            | 0.03 ; 0.38   | 221               | 435                  |
|                          | DIM 29-35 | 0.12 (0.04) | 0.12 (0.09 ; 0.15)            | 0.002 ; 0.28  | 221               | 438                  |
|                          | DIM 36-42 | 0.11 (0.04) | 0.11 (0.08 ; 0.14)            | 0.0003 ; 0.28 | 219               | 437                  |
|                          | DIM 43-50 | 0.10 (0.04) | 0.10 (0.08 ; 0.13)            | 0.01 ; 0.27   | 219               | 450                  |
|                          | DIM 1-50  | 0.15 (0.08) | 0.14 (0.10 ; 0.19)            | 0.0003 ; 0.93 | 223               | 2754                 |
| Glucose (mM)             | DIM 1-7   | 0.13 (0.07) | 0.13 (0.09 ; 0.17)            | 0.001 ; 0.35  | 135               | 142                  |
|                          | DIM 8-14  | 0.17 (0.08) | 0.17 (0.12 ; 0.21)            | 0.005 ; 0.44  | 219               | 424                  |
|                          | DIM 15-21 | 0.21 (0.09) | 0.20 (0.15 ; 0.26)            | 0.02 ; 0.53   | 218               | 428                  |
|                          | DIM 22-28 | 0.24 (0.09) | 0.23 (0.18 ; 0.29)            | 0.0005 ; 0.52 | 221               | 435                  |
|                          | DIM 29-35 | 0.27 (0.09) | 0.26 (0.20 ; 0.33)            | 0.006 ; 0.64  | 221               | 438                  |
|                          | DIM 36-42 | 0.28 (0.10) | 0.27 (0.21 ; 0.34)            | 0.02 ; 0.62   | 219               | 437                  |
|                          | DIM 43-50 | 0.29 (0.10) | 0.29 (0.22 ; 0.34)            | 0.03 ; 0.69   | 219               | 450                  |
|                          | DIM 1-50  | 0.24 (0.10) | 0.23 (0.17 ; 0.30)            | 0.0005 ; 0.69 | 223               | 2754                 |
| BHB (μM)                 | DIM 1-7   | 64.3 (35.1) | 52.2 (42.7 ; 75.3)            | 20.0 ; 238    | 135               | 142                  |
|                          | DIM 8-14  | 64.9 (56.8) | 50.1 (40.4 ; 72.9)            | 20.0 ; 701    | 219               | 424                  |
|                          | DIM 15-21 | 65.7 (71.5) | 50.0 (39.0 ; 67.5)            | 20.0 ; 858    | 218               | 428                  |
|                          | DIM 22-28 | 67.1 (75.9) | 50.5 (39.0 ; 69.5)            | 20.0 ; 896    | 221               | 435                  |
|                          | DIM 29-35 | 65.0 (75.5) | 50.8 (37.7 ; 65.0)            | 19.6 ; 819    | 221               | 437                  |
|                          | DIM 36-42 | 60.1 (55.6) | 48.3 (37.3 ; 62.0)            | 19.7 ; 735    | 219               | 436                  |
|                          | DIM 43-50 | 56.8 (42.6) | 47.5 (38.0 ; 61.5)            | 19.5 ; 523    | 218               | 446                  |
|                          | DIM 1-50  | 63.3 (63.0) | 50.0 (38.4 ; 66.5)            | 19.5 ; 896    | 223               | 2748                 |
| Isocitrate (mM)          | DIM 1-7   | 0.21 (0.05) | 0.21 (0.18 ; 0.24)            | 0.09 ; 0.42   | 135               | 142                  |
|                          | DIM 8-14  | 0.20 (0.05) | 0.20 (0.17 ; 0.23)            | 0.09 ; 0.44   | 219               | 424                  |
|                          | DIM 15-21 | 0.18 (0.05) | 0.17 (0.15 ; 0.20)            | 0.04 ; 0.33   | 218               | 429                  |
|                          | DIM 22-28 | 0.16 (0.05) | 0.16 (0.13 ; 0.19)            | 0.01 ; 0.34   | 221               | 435                  |

|                      |           |             |                    |               |     |      |
|----------------------|-----------|-------------|--------------------|---------------|-----|------|
| Urea (mM)            | DIM 29-35 | 0.15 (0.04) | 0.15 (0.12 ; 0.18) | 0.01 ; 0.32   | 221 | 437  |
|                      | DIM 36-42 | 0.14 (0.04) | 0.14 (0.12 ; 0.16) | 0.02 ; 0.31   | 219 | 436  |
|                      | DIM 43-50 | 0.14 (0.04) | 0.13 (0.11 ; 0.16) | 0.0007 ; 0.25 | 218 | 446  |
|                      | DIM 1-50  | 0.16 (0.05) | 0.16 (0.13 ; 0.20) | 0.0007 ; 0.44 | 223 | 2749 |
|                      | DIM 1-7   | 3.15 (1.11) | 3.08 (2.41 ; 3.84) | 0.79 ; 6.09   | 133 | 140  |
|                      | DIM 8-14  | 3.12 (1.26) | 3.04 (2.31 ; 3.79) | 0.56 ; 7.99   | 219 | 425  |
|                      | DIM 15-21 | 3.14 (1.38) | 3.04 (2.21 ; 4.00) | 0.47 ; 8.30   | 218 | 428  |
|                      | DIM 22-28 | 3.09 (1.37) | 2.94 (2.10 ; 4.03) | 0.12 ; 7.78   | 221 | 433  |
|                      | DIM 29-35 | 3.29 (1.46) | 3.13 (2.23 ; 4.11) | 0.08 ; 8.33   | 221 | 434  |
|                      | DIM 36-42 | 3.41 (1.34) | 3.31 (2.44 ; 4.21) | 0.29 ; 7.49   | 219 | 436  |
|                      | DIM 43-50 | 3.38 (1.44) | 3.24 (2.40 ; 4.19) | 0.70 ; 8.53   | 219 | 445  |
|                      | DIM 1-50  | 3.23 (1.37) | 3.11 (2.29 ; 4.04) | 0.08 ; 8.53   | 223 | 2741 |
|                      | DIM 1-7   | 189 (58.2)  | 195 (159 ; 225)    | 10.2 ; 349    | 135 | 142  |
|                      | DIM 8-14  | 177 (60.2)  | 182 (143 ; 215)    | 9.19 ; 343    | 219 | 424  |
|                      | DIM 15-21 | 163 (51.1)  | 166 (133 ; 195)    | 5.04 ; 326    | 218 | 429  |
| Uric acid ( $\mu$ M) | DIM 22-28 | 152 (54.5)  | 156 (123 ; 186)    | 2.36 ; 300    | 221 | 435  |
|                      | DIM 29-35 | 152 (67.1)  | 148 (122 ; 188)    | 4.85 ; 1080   | 221 | 438  |
|                      | DIM 36-42 | 145 (51.2)  | 144 (115 ; 179)    | 6.08 ; 272    | 219 | 436  |
|                      | DIM 43-50 | 142 (53.5)  | 142 (112 ; 176)    | 5.91 ; 312    | 219 | 450  |
|                      | DIM 1-50  | 157 (58.2)  | 158 (124 ; 193)    | 2.36 ; 1080   | 223 | 2754 |

<sup>1</sup> M: molar (mol/l), BHB:  $\beta$ -hydroxybutyrate.

<sup>2</sup> Q1: first quartile, Q3: third quartile.



**Supplementary Table S4** Summary statistics of milk enzymes in Holstein dairy cows at different days-in-milk (DIM) intervals

| Measure <sup>1</sup>                           | Period    | Mean (SD)   | Median (Q1 ; Q3) <sup>1</sup> | Min ; Max     | N <sub>cows</sub> | N <sub>samples</sub> |
|------------------------------------------------|-----------|-------------|-------------------------------|---------------|-------------------|----------------------|
| N-acetyl- $\beta$ -D-glucosaminidase (units/l) | DIM 1-7   | 4.46 (2.63) | 3.90 (2.76 ; 5.18)            | 1.32 ; 18.1   | 134               | 141                  |
|                                                | DIM 8-14  | 3.13 (2.07) | 2.60 (1.95 ; 3.63)            | 0.89 ; 25.1   | 219               | 424                  |
|                                                | DIM 15-21 | 2.29 (1.66) | 1.92 (1.44 ; 2.52)            | 0.36 ; 17.0   | 218               | 429                  |
|                                                | DIM 22-28 | 1.80 (1.09) | 1.53 (1.18 ; 2.06)            | 0.22 ; 11.2   | 221               | 435                  |
|                                                | DIM 29-35 | 1.61 (1.04) | 1.37 (1.05 ; 1.80)            | 0.41 ; 11.4   | 221               | 438                  |
|                                                | DIM 36-42 | 1.59 (2.45) | 1.22 (0.97 ; 1.68)            | 0.36 ; 48.1   | 219               | 437                  |
|                                                | DIM 43-50 | 1.61 (2.29) | 1.57 (0.91 ; 1.57)            | 0.29 ; 32.6   | 219               | 450                  |
|                                                | DIM 1-50  | 2.12 (2.05) | 1.62 (1.15 ; 2.40)            | 0.22 ; 48.1   | 223               | 2754                 |
| Lactate dehydrogenase (units/l)                | DIM 1-7   | 6.22 (5.04) | 5.00 (3.34 ; 6.90)            | 1.61 ; 32.4   | 134               | 141                  |
|                                                | DIM 8-14  | 4.65 (3.31) | 3.79 (2.75 ; 5.38)            | 1.32 ; 30.5   | 219               | 424                  |
|                                                | DIM 15-21 | 3.51 (3.94) | 2.65 (1.89 ; 3.79)            | 0.42 ; 46.0   | 218               | 429                  |
|                                                | DIM 22-28 | 2.92 (2.43) | 2.22 (1.62 ; 3.37)            | 0.27 ; 26.1   | 221               | 435                  |
|                                                | DIM 29-35 | 2.72 (2.47) | 2.10 (1.60 ; 2.97)            | 0.0007 ; 29.3 | 221               | 438                  |
|                                                | DIM 36-42 | 2.52 (2.53) | 1.91 (1.45 ; 2.66)            | 0.62 ; 32.8   | 219               | 437                  |
|                                                | DIM 43-50 | 2.75 (3.56) | 1.92 (1.41 ; 2.64)            | 0.55 ; 32.6   | 219               | 450                  |
|                                                | DIM 1-50  | 3.33 (3.36) | 2.40 (1.69 ; 3.73)            | 0.0007 ; 46.0 | 223               | 2754                 |

<sup>1</sup> Q1: first quartile, Q3: third quartile.

**Supplementary Table S5** Summary statistics of serum IGF-1, plasma metabolites, and index of physiological imbalance (PI-index)<sup>1</sup> in Holstein dairy cows at different days-in-milk (DIM)

| Measure <sup>2</sup>  | Period | Mean (SD)     | Median (Q1 ; Q3) <sup>3</sup> | Min ; Max     | N   |
|-----------------------|--------|---------------|-------------------------------|---------------|-----|
| Glucose (mM)          | DIM 14 | 3.38 (0.49)   | 3.40 (3.10 ; 3.70)            | 1.70 ; 4.51   | 224 |
|                       | DIM 35 | 3.54 (0.51)   | 3.60 (3.28 ; 3.90)            | 1.93 ; 4.70   | 223 |
| Urea (mM)             | DIM 14 | 3.15 (1.15)   | 3.1 (2.3 ; 3.8)               | 1.0 ; 6.7     | 224 |
|                       | DIM 35 | 3.47 (1.23)   | 3.4 (2.4 ; 4.3)               | 0.9 ; 6.9     | 223 |
| Cholesterol (mM)      | DIM 14 | 3.03 (0.71)   | 2.98 (2.54 ; 3.43)            | 1.52 ; 5.05   | 224 |
|                       | DIM 35 | 4.58 (1.04)   | 4.58 (3.75 ; 5.31)            | 1.90 ; 7.33   | 223 |
| Fructosamine (μM)     | DIM 14 | 252.4 (18.2)  | 250.9 (240.4 ; 264.4)         | 200.1 ; 294.8 | 221 |
|                       | DIM 35 | 254.4 (18.2)  | 254.1 (241.4 ; 267.4)         | 192.8 ; 298.8 | 219 |
| BHB (mM)              | DIM 14 | 0.71 (0.60)   | 0.53 (0.40 ; 0.76)            | 0.19 ; 5.23   | 224 |
|                       | DIM 35 | 0.65 (0.48)   | 0.52 (0.39 ; 0.74)            | 0.23 ; 4.29   | 223 |
| NEFA (μekv/l)         | DIM 14 | 733.8 (445.9) | 616.5 (446.7 ; 923.9)         | 95.8 ; 2757   | 224 |
|                       | DIM 35 | 469.6 (335.2) | 385.4 (227.7 ; 626.6)         | 26.1 ; 2254   | 223 |
| IGF-1 (ng/ml)         | DIM 14 | 93.1 (66.7)   | 75.5 (43.1 ; 130.1)           | 6.62 ; 435.6  | 227 |
|                       | DIM 35 | 110.9 (70.7)  | 94.9 (57.0 ; 139.8)           | 12.6 ; 399.5  | 225 |
| PI-index <sup>1</sup> | DIM 14 | 0.54 (2.18)   | 0.43 (-0.86 ; 1.67)           | -4.42 ; 8.31  | 224 |
|                       | DIM 35 | -0.54 (2.21)  | -0.76 (-2.02 ; 0.65)          | -5.74 ; 6.72  | 223 |

<sup>1</sup> PI-index = (NEFA + BHB – glucose), calculated from standardised plasma metabolites.

<sup>2</sup> M: molar (mol/l), BHB: β-hydroxybutyrate, NEFA: non-esterified fatty acids

<sup>3</sup> Q1: first quartile, Q3: third quartile
